# Supplementary material for: Transcriptome analysis indicates TFEB1 and YEATS4 as regulatory transcription factors for drug resistance of ovarian cancer
Source: PubMed Central journal article supplement (PMC4741586; doi:10.18632/oncotarget.5208), 2015-08-17
Supplement: oncotarget-06-31030-s001.pdf [file oncotarget-06-31030-s001.pdf]

## Transcriptome analysis indicates *TFEB1* and *YEATS4* as regulatory transcription factors for drug resistance of ovarian cancer

### Supplementary Material

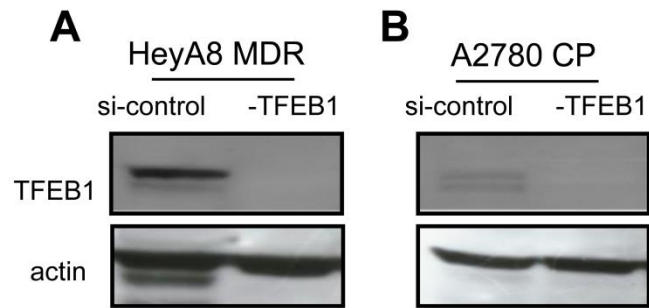

**Supplementary Figure 1.** Efficacy of *TFEB1* siRNA. HeyA8-MDR and A2780-CP cells were treated with 10  $\mu$ M *TFEB1* siRNA. Cells were harvested at 48 h after siRNA treatment, and cell lysates were assessed using western blotting. Expression levels of tubulin (Santa Cruz Biotechnology) and *TFEB1* (Santa Cruz Biotechnology) were measured.

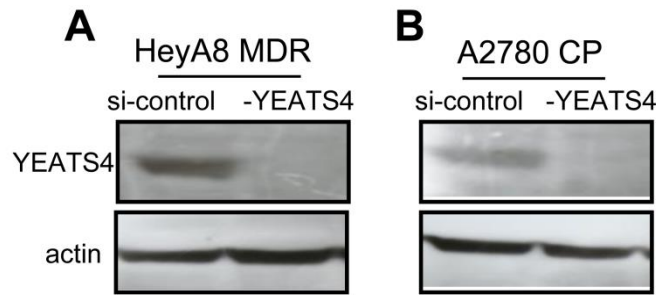

**Supplementary Figure 2.** Efficacy of *YEATS4* siRNA. HeyA8-MDR and A2780-CP cells were treated with 10  $\mu$ M *YEATS4* siRNA. Cells were harvested at 48 h after siRNA treatment, and cell lysates were assessed using western blotting. Expression levels of tubulin (Santa Cruz Biotechnology) and *YEATS4* (Santa Cruz Biotechnology) were measured.

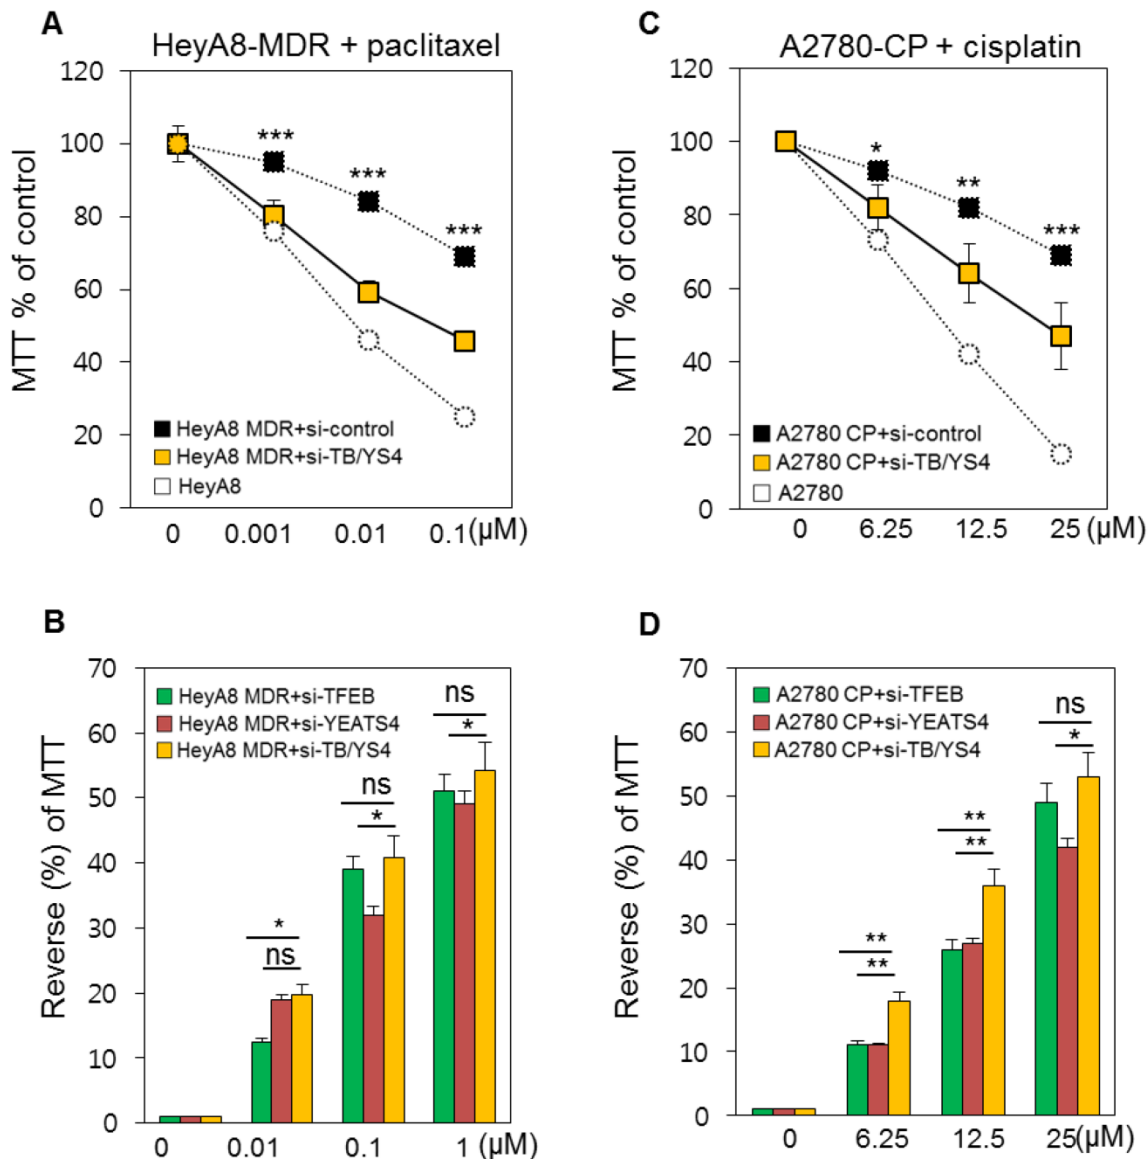

**Supplementary Figure 3.** Effect of combination treatment with both *TFEB1* and *YEATS4* siRNAs. A, HeyA8-MDR cells were treated with *TFEB1* and *YEATS4* siRNAs, and induction of apoptosis by using increasing doses of paclitaxel was measured. B, proportion of apoptotic cells was confirmed using PI staining. Apoptosis due to treatment with either *TFEB1* or *YEATS4* siRNA was used as control. C, A2780-CP cells were treated with *TFEB1* and *YEATS4* siRNAs, and induction of apoptosis by using increasing doses of paclitaxel was measured. D, proportion of apoptotic cells was confirmed using PI staining. ns, not significant; \* $P < 0.05$ ; \*\* $P < 0.01$ ; \*\*\* $P < 0.001$ .
