# Supplementary material for: Transcriptome analysis indicates TFEB1 and YEATS4 as regulatory transcription factors for drug resistance of ovarian cancer
Source: PubMed Central journal article supplement (PMC4741586; doi:10.18632/oncotarget.5208), 2015-08-17
Supplement: oncotarget-06-31030-s002.pdf [file oncotarget-06-31030-s002.pdf]

| Gene Accession | Gene Symbol | Gene Description                                                           | log2 ratio |
|----------------|-------------|----------------------------------------------------------------------------|------------|
| NM_016247      | IMPG2       | interphotoreceptor matrix proteoglycan 2                                   | 1.76459424 |
| NM_002909      | REG1A       | regenerating islet-derived 1 alpha                                         | 1.48714053 |
| NM_001056      | SULT1C2     | sulfotransferase family, cytosolic, 1C, member 2                           | 1.46609364 |
| NM_006183      | NTS         | neurotensin                                                                | 1.45018641 |
| NM_004378      | CRABP1      | cellular retinoic acid binding protein 1                                   | 1.37032278 |
| NM_012152      | LPAR3       | lysophosphatidic acid receptor 3                                           | 1.31553516 |
| NM_014585      | SLC40A1     | solute carrier family 40 (iron-regulated transporter), member 1            | 1.30543571 |
| NM_031422      | CHST9       | carbohydrate (N-acetylgalactosamine 4-O) sulfotransferase 9                | 1.24744614 |
| NM_020775      | KIAA1324    | KIAA1324                                                                   | 1.19516519 |
| NM_024626      | VTCN1       | V-set domain containing T cell activation inhibitor 1                      | 1.19146936 |
| NM_032918      | RERG        | RAS-like, estrogen-regulated, growth inhibitor                             | 1.17562426 |
| NM_004615      | TSPAN7      | tetraspanin 7                                                              | 1.16990442 |
| NM_000921      | PDE3A       | phosphodiesterase 3A, cGMP-inhibited                                       | 1.1624665  |
| NM_001584      | MPPED2      | metallophosphoesterase domain containing 2                                 | 1.15424384 |
| NM_001657      | AREG        | amphiregulin                                                               | 1.14426685 |
| NM_002310      | LIFR        | leukemia inhibitory factor receptor alpha                                  | 1.14385228 |
| NM_006614      | CHL1        | cell adhesion molecule with homology to L1CAM (close homolog of L1)        | 1.11501777 |
| NM_138788      | TMEM45B     | transmembrane protein 45B                                                  | 1.08133516 |
| NM_001786      | CDC2        | cell division cycle 2, G1 to S and G2 to M                                 | 1.06138146 |
| NM_002644      | PIGR        | polymeric immunoglobulin receptor                                          | 1.01224776 |
| NM_024636      | STEAP4      | STEAP family member 4                                                      | 1.00814747 |
| NM_014373      | GPR160      | G protein-coupled receptor 160                                             | 1.00787904 |
| NM_004529      | MLLT3       | myeloid/lymphoid or mixed-lineage leukemia (trithorax homolog, Drosophila) | 1.00673925 |
| NM_032303      | HSDL2       | hydroxysteroid dehydrogenase like 2                                        | 0.99978757 |
| NM_000898      | MAOB        | monoamine oxidase B                                                        | 0.99363289 |
| NM_004900      | APOBEC3B    | apolipoprotein B mRNA editing enzyme, catalytic polypeptide-like 3B        | 0.98504565 |
| NM_002591      | PCK1        | phosphoenolpyruvate carboxykinase 1 (soluble)                              | 0.98209981 |
| NM_173081      | ARMC3       | armadillo repeat containing 3                                              | 0.98053071 |
| NM_002988      | CCL18       | chemokine (C-C motif) ligand 18 (pulmonary and activation-regulated)       | 0.97559848 |
| NM_002354      | EPCAM       | epithelial cell adhesion molecule                                          | 0.97249952 |
| NM_021804      | ACE2        | angiotensin I converting enzyme (peptidyl-dipeptidase A) 2                 | 0.94916822 |
| NM_017912      | HERC6       | hect domain and RLD 6                                                      | 0.9445463  |
| NM_001123364   | C6orf186    | chromosome 6 open reading frame 186                                        | 0.92572587 |
| NM_001100624   | CENPN       | centromere protein N                                                       | 0.92568961 |
| NM_024580      | EFTUD1      | elongation factor Tu GTP binding domain containing 1                       | 0.92395541 |
| NM_005063      | SCD         | stearoyl-CoA desaturase (delta-9-desaturase)                               | 0.91695267 |
| NM_002038      | IFI6        | interferon, alpha-inducible protein 6                                      | 0.9161406  |
| NM_001874      | CPM         | carboxypeptidase M                                                         | 0.91300218 |
| NR_002754      | RNU5E       | RNA, U5E small nuclear                                                     | 0.91053744 |
| NM_001122659   | EDNRB       | endothelin receptor type B                                                 | 0.90757316 |
| NM_012253      | TKTL1       | transketolase-like 1                                                       | 0.90724617 |
| NM_015225      | PRUNE2      | prune homolog 2 (Drosophila)                                               | 0.90516309 |
| NM_001038628   | B3GALNT1    | beta-1,3-N-acetylgalactosaminyltransferase 1 (globoside blood group)       | 0.90484702 |
| NM_001657      | AREG        | amphiregulin                                                               | 0.90152499 |
| NM_003106      | SOX2        | SRY (sex determining region Y)-box 2                                       | 0.89768281 |

|                 |          |                                                                                       |            |
|-----------------|----------|---------------------------------------------------------------------------------------|------------|
| NM_005950       | MT1G     | metallothionein 1G                                                                    | 0.88975557 |
| NM_015028       | TNIK     | TRAF2 and NCK interacting kinase                                                      | 0.88927635 |
| NM_004753       | DHRS3    | dehydrogenase/reductase (SDR family) member 3                                         | 0.88772279 |
| NM_006547       | IGF2BP3  | insulin-like growth factor 2 mRNA binding protein 3                                   | 0.88365281 |
| NM_001148       | ANK2     | ankyrin 2, neuronal                                                                   | 0.88183633 |
| BC022252        | C10orf57 | chromosome 10 open reading frame 57                                                   | 0.87561244 |
| NR_024617       | PART1    | prostate androgen-regulated transcript 1                                              | 0.87481909 |
| NM_001083619    | GRIA2    | glutamate receptor, ionotropic, AMPA 2                                                | 0.87402773 |
| ENST00000299997 | MGC9913  | hypothetical protein MGC9913                                                          | 0.87217567 |
| NM_018492       | PBK      | PDZ binding kinase                                                                    | 0.86177965 |
| NM_001130862    | RAD51AP1 | RAD51 associated protein 1                                                            | 0.86126269 |
| NR_023361       | AP3S2    | adaptor-related protein complex 3, sigma 2 subunit                                    | 0.86008562 |
| NM_025130       | HKDC1    | hexokinase domain containing 1                                                        | 0.85951359 |
| NM_020640       | DCUN1D1  | DCN1, defective in cullin neddylation 1, domain containing 1 ( <i>S. cerevisiae</i> ) | 0.85893533 |
| NM_001001548    | CD36     | CD36 molecule (thrombospondin receptor)                                               | 0.85211478 |
| NM_006061       | CRISP3   | cysteine-rich secretory protein 3                                                     | 0.85134412 |
| NM_198477       | CXCL17   | chemokine (C-X-C motif) ligand 17                                                     | 0.8500587  |
| NM_153234       | LIX1     | Lix1 homolog (chicken)                                                                | 0.84840001 |
| NM_025153       | ATP10B   | ATPase, class V, type 10B                                                             | 0.84646683 |
| NM_003503       | CDC7     | cell division cycle 7 homolog ( <i>S. cerevisiae</i> )                                | 0.84634386 |
| NM_001001995    | GPM6B    | glycoprotein M6B                                                                      | 0.84571522 |
| NM_001135091    | MUC15    | mucin 15, cell surface associated                                                     | 0.84511965 |
| NM_144765       | MPZL2    | myelin protein zero-like 2                                                            | 0.84434057 |
| NM_004523       | KIF11    | kinesin family member 11                                                              | 0.84419238 |
| NR_003922       | PMCHL2   | pro-melanin-concentrating hormone-like 2                                              | 0.84352333 |
| NR_003922       | PMCHL2   | pro-melanin-concentrating hormone-like 2                                              | 0.84344384 |
| AB209021        | EIF4A2   | eukaryotic translation initiation factor 4A, isoform 2                                | 0.84158224 |
| NM_052860       | ZNF300   | zinc finger protein 300                                                               | 0.83984044 |
| NM_006820       | IFI44L   | interferon-induced protein 44-like                                                    | 0.83860225 |
| NR_001296       | TRY6     | trypsinogen C                                                                         | 0.83786592 |
| NM_152574       | TTC39B   | tetratricopeptide repeat domain 39B                                                   | 0.83616224 |
| NM_003629       | PIK3R3   | phosphoinositide-3-kinase, regulatory subunit 3 (gamma)                               | 0.83158367 |
| NM_006252       | PRKAA2   | protein kinase, AMP-activated, alpha 2 catalytic subunit                              | 0.82965467 |
| NM_003318       | TTK      | TTK protein kinase                                                                    | 0.82876457 |
| NM_001859       | SLC31A1  | solute carrier family 31 (copper transporters), member 1                              | 0.8263801  |
| NM_014791       | MELK     | maternal embryonic leucine zipper kinase                                              | 0.82473589 |
| NM_002703       | PPAT     | phosphoribosyl pyrophosphate amidotransferase                                         | 0.82440676 |
| NM_006080       | SEMA3A   | sema domain, immunoglobulin domain (Ig), short basic domain, secreted,                | 0.82410902 |
| NM_004083       | DDIT3    | DNA-damage-inducible transcript 3                                                     | 0.82264438 |
| NM_002493       | NDUFB6   | NADH dehydrogenase (ubiquinone) 1 beta subcomplex, 6, 17kDa                           | 0.82107868 |
| NM_031469       | SH3BGRL2 | SH3 domain binding glutamic acid-rich protein like 2                                  | 0.81805136 |
| NM_005622       | ACSM3    | acyl-CoA synthetase medium-chain family member 3                                      | 0.80567515 |
| NM_013230       | CD24     | CD24 molecule                                                                         | 0.80054282 |
| NM_001135811    | FAM60A   | family with sequence similarity 60, member A                                          | 0.79943136 |
| NM_022346       | NCAPG    | non-SMC condensin I complex, subunit G                                                | 0.79929796 |
| NM_000328       | RPGR     | retinitis pigmentosa GTPase regulator                                                 | 0.79886972 |
| NM_198947       | FAM111B  | family with sequence similarity 111, member B                                         | 0.7962005  |

|              |          |                                                                           |            |
|--------------|----------|---------------------------------------------------------------------------|------------|
| NM_003234    | TFRC     | transferrin receptor (p90, CD71)                                          | 0.79527144 |
| AB039791     | ARP11    | actin-related Arp11                                                       | 0.79517156 |
| NM_014750    | DLGAP5   | discs, large (Drosophila) homolog-associated protein 5                    | 0.79462947 |
| NM_001099772 | CYP4B1   | cytochrome P450, family 4, subfamily B, polypeptide 1                     | 0.79433222 |
| NM_007329    | DMBT1    | deleted in malignant brain tumors 1                                       | 0.79345758 |
| NR_002588    | SNORA4   | small nucleolar RNA, H/ACA box 4                                          | 0.79295231 |
| NM_020922    | WNK3     | WNK lysine deficient protein kinase 3                                     | 0.7916566  |
| NM_018490    | LGR4     | leucine-rich repeat-containing G protein-coupled receptor 4               | 0.79150053 |
| NM_024122    | APOO     | apolipoprotein O                                                          | 0.78937055 |
| NM_002612    | PDK4     | pyruvate dehydrogenase kinase, isozyme 4                                  | 0.78861261 |
| NM_004335    | BST2     | bone marrow stromal cell antigen 2                                        | 0.78782091 |
| NM_173496    | MPP7     | membrane protein, palmitoylated 7 (MAGUK p55 subfamily member 7)          | 0.78374024 |
| NM_152321    | ERP27    | endoplasmic reticulum protein 27                                          | 0.78364788 |
| NM_012153    | EHF      | ets homologous factor                                                     | 0.78244982 |
| NM_007231    | SLC6A14  | solute carrier family 6 (amino acid transporter), member 14               | 0.78211797 |
| NM_004061    | CDH12    | cadherin 12, type 2 (N-cadherin 2)                                        | 0.78172414 |
| NM_001145319 | PLS1     | plastin 1 (I isoform)                                                     | 0.77890112 |
| NM_004362    | CLGN     | calmegin                                                                  | 0.77749163 |
| NM_003270    | TSPAN6   | tetraspanin 6                                                             | 0.77515    |
| BC017473     | C2orf43  | chromosome 2 open reading frame 43                                        | 0.77502668 |
| NM_006733    | CENPI    | centromere protein I                                                      | 0.77130216 |
| NM_206953    | PRAME    | preferentially expressed antigen in melanoma                              | 0.76924625 |
| NM_016057    | COPZ1    | coatamer protein complex, subunit zeta 1                                  | 0.76818557 |
| NM_001548    | IFIT1    | interferon-induced protein with tetratricopeptide repeats 1               | 0.76800278 |
| NM_000745    | CHRNA5   | cholinergic receptor, nicotinic, alpha 5                                  | 0.76436212 |
| NM_024817    | THSD4    | thrombospondin, type I, domain containing 4                               | 0.76135002 |
| NM_001017438 | CT45A6   | cancer/testis antigen family 45, member A6                                | 0.75489736 |
| NM_017645    | HAUS6    | HAUS augmin-like complex, subunit 6                                       | 0.75010539 |
| NM_024491    | CEP70    | centrosomal protein 70kDa                                                 | 0.74985541 |
| NM_022662    | ANAPC1   | anaphase promoting complex subunit 1                                      | 0.74875189 |
| NM_014999    | RAB21    | RAB21, member RAS oncogene family                                         | 0.74787747 |
| NM_002483    | CEACAM6  | carcinoembryonic antigen-related cell adhesion molecule 6 (non-specific c | 0.74707009 |
| NM_006745    | SC4MOL   | sterol-C4-methyl oxidase-like                                             | 0.74703215 |
| NM_002354    | EPCAM    | epithelial cell adhesion molecule                                         | 0.74505219 |
| NM_001099676 | C12orf56 | chromosome 12 open reading frame 56                                       | 0.74330821 |
| NM_001040624 | NCALD    | neurocalcin delta                                                         | 0.74253409 |
| NM_001099    | ACPP     | acid phosphatase, prostate                                                | 0.7419994  |
| NM_001113378 | FANCI    | Fanconi anemia, complementation group I                                   | 0.7413188  |
| NM_181806    | AASDH    | aminoadipate-semialdehyde dehydrogenase                                   | 0.74079707 |
| NM_017645    | HAUS6    | HAUS augmin-like complex, subunit 6                                       | 0.73953806 |
| NM_178824    | WDR49    | WD repeat domain 49                                                       | 0.73845038 |
| NM_000240    | MAOA     | monoamine oxidase A                                                       | 0.73785664 |
| NM_032368    | LZIC     | leucine zipper and CTNNBIP1 domain containing                             | 0.73668675 |
| NM_014518    | ZNF229   | zinc finger protein 229                                                   | 0.73546155 |
| NM_001130157 | MLF1     | myeloid leukemia factor 1                                                 | 0.73324582 |
| NM_001017436 | CT45A4   | cancer/testis antigen family 45, member A4                                | 0.73275261 |
| NM_001039844 | ACBD7    | acyl-Coenzyme A binding domain containing 7                               | 0.73176291 |

|              |           |                                                                           |            |
|--------------|-----------|---------------------------------------------------------------------------|------------|
| NM_018431    | DOK5      | docking protein 5                                                         | 0.72858539 |
| NM_152582    | CT45A2    | cancer/testis antigen family 45, member A2                                | 0.72825072 |
| NM_000266    | NDP       | Norrie disease (pseudoglioma)                                             | 0.72715227 |
| NM_004701    | CCNB2     | cyclin B2                                                                 | 0.72624423 |
| NM_014783    | ARHGAP11A | Rho GTPase activating protein 11A                                         | 0.72550171 |
| NM_001074    | UGT2B7    | UDP glucuronosyltransferase 2 family, polypeptide B7                      | 0.72548512 |
| NM_207015    | NAALADL2  | N-acetylated alpha-linked acidic dipeptidase-like 2                       | 0.72538407 |
| NM_017412    | FZD3      | frizzled homolog 3 (Drosophila)                                           | 0.72476394 |
| NM_032796    | SYAP1     | synapse associated protein 1, SAP47 homolog (Drosophila)                  | 0.72059021 |
| NM_002125    | HLA-DRB5  | major histocompatibility complex, class II, DR beta 5                     | 0.71885688 |
| NM_015225    | PRUNE2    | prune homolog 2 (Drosophila)                                              | 0.71814814 |
| NR_002433    | SNORD12C  | small nucleolar RNA, C/D box 12C                                          | 0.71685002 |
| NM_012062    | DNM1L     | dynamamin 1-like                                                          | 0.71643004 |
| NM_139248    | LIPH      | lipase, member H                                                          | 0.71470858 |
| NM_004616    | TSPAN8    | tetraspanin 8                                                             | 0.71333595 |
| NM_017996    | DET1      | de-etiolated homolog 1 (Arabidopsis)                                      | 0.71313647 |
| NM_033505    | SELI      | selenoprotein I                                                           | 0.70957949 |
| NM_001007551 | CT45A5    | cancer/testis antigen family 45, member A5                                | 0.70944498 |
| NM_005447    | RASSF9    | Ras association (RalGDS/AF-6) domain family (N-terminal) member 9         | 0.70944102 |
| NM_017697    | ESRP1     | epithelial splicing regulatory protein 1                                  | 0.70943792 |
| NM_178815    | ARL5B     | ADP-ribosylation factor-like 5B                                           | 0.7088004  |
| NM_001005353 | AK3L1     | adenylate kinase 3-like 1                                                 | 0.70876562 |
| NM_152259    | C15orf42  | chromosome 15 open reading frame 42                                       | 0.7054673  |
| NM_002637    | PHKA1     | phosphorylase kinase, alpha 1 (muscle)                                    | 0.70463684 |
| NM_012137    | DDAH1     | dimethylarginine dimethylaminohydrolase 1                                 | 0.70456418 |
| NM_001134296 | AP3M2     | adaptor-related protein complex 3, mu 2 subunit                           | 0.70389932 |
| NM_002164    | IDO1      | indoleamine 2,3-dioxygenase 1                                             | 0.70365679 |
| NM_001565    | CXCL10    | chemokine (C-X-C motif) ligand 10                                         | 0.70033133 |
| NM_002849    | PTPFR     | protein tyrosine phosphatase, receptor type, R                            | 0.69841442 |
| NM_006639    | CYSLTR1   | cysteinyl leukotriene receptor 1                                          | 0.69813924 |
| NM_022662    | ANAPC1    | anaphase promoting complex subunit 1                                      | 0.69801882 |
| NM_152697    | SLC44A5   | solute carrier family 44, member 5                                        | 0.69761002 |
| NM_004484    | GPC3      | glypican 3                                                                | 0.69527378 |
| NM_001398    | ECH1      | enoyl Coenzyme A hydratase 1, peroxisomal                                 | 0.69422543 |
| NM_007235    | XPOT      | exportin, tRNA (nuclear export receptor for tRNAs)                        | 0.69355512 |
| NM_003477    | PDHX      | pyruvate dehydrogenase complex, component X                               | 0.69159384 |
| NM_138573    | NRG4      | neuregulin 4                                                              | 0.69147562 |
| NM_003522    | HIST1H2BF | histone cluster 1, H2bf                                                   | 0.69129073 |
| NM_001146108 | PTGR1     | prostaglandin reductase 1                                                 | 0.69038632 |
| NM_001105243 | PCDH19    | protocadherin 19                                                          | 0.68981733 |
| NM_173567    | EPHX4     | epoxide hydrolase 4                                                       | 0.68967232 |
| NR_002563    | SNORD27   | small nucleolar RNA, C/D box 27                                           | 0.68600932 |
| NM_005013    | NUCB2     | nucleobindin 2                                                            | 0.68555499 |
| NM_001130963 | TMEM194A  | transmembrane protein 194A                                                | 0.684286   |
| NM_182751    | MCM10     | minichromosome maintenance complex component 10                           | 0.67886761 |
| NM_000338    | SLC12A1   | solute carrier family 12 (sodium/potassium/chloride transporters), member | 0.67565657 |
| NM_002759    | EIF2AK2   | eukaryotic translation initiation factor 2-alpha kinase 2                 | 0.67457751 |

|              |           |                                                                              |            |
|--------------|-----------|------------------------------------------------------------------------------|------------|
| NM_080657    | RSAD2     | radical S-adenosyl methionine domain containing 2                            | 0.67316269 |
| NM_001042519 | C2orf88   | chromosome 2 open reading frame 88                                           | 0.67211375 |
| NM_016323    | HERC5     | hect domain and RLD 5                                                        | 0.67138965 |
| NM_031217    | KIF18A    | kinesin family member 18A                                                    | 0.67011376 |
| NM_001145191 | LOC285550 | hypothetical protein LOC285550                                               | 0.67007598 |
| NM_002631    | PGD       | phosphogluconate dehydrogenase                                               | 0.66770315 |
| NM_021252    | RAB18     | RAB18, member RAS oncogene family                                            | 0.66767421 |
| NM_005530    | IDH3A     | isocitrate dehydrogenase 3 (NAD+) alpha                                      | 0.66755188 |
| NM_018269    | ADI1      | acireductone dioxygenase 1                                                   | 0.66691515 |
| NM_004293    | GDA       | guanine deaminase                                                            | 0.66569702 |
| NM_001136262 | LOC552889 | hypothetical protein LOC552889                                               | 0.66330936 |
| NM_001039569 | AP1S3     | adaptor-related protein complex 1, sigma 3 subunit                           | 0.66235686 |
| BC105048     | KIAA1958  | KIAA1958                                                                     | 0.66205121 |
| NM_001135694 | VDAC3     | voltage-dependent anion channel 3                                            | 0.66164586 |
| NM_032299    | DCUN1D5   | DCN1, defective in cullin neddylation 1, domain containing 5 (S. cerevisiae) | 0.66135362 |
| NM_002770    | PRSS2     | protease, serine, 2 (trypsin 2)                                              | 0.66002368 |
| NM_022780    | RMND5A    | required for meiotic nuclear division 5 homolog A (S. cerevisiae)            | 0.65999062 |
| NM_000933    | PLCB4     | phospholipase C, beta 4                                                      | 0.65956939 |
| NM_016570    | ERGIC2    | ERGIC and golgi 2                                                            | 0.65805238 |
| NM_015065    | EXPH5     | exophilin 5                                                                  | 0.65695095 |
| NM_012415    | RAD54B    | RAD54 homolog B (S. cerevisiae)                                              | 0.65653189 |
| BC008502     | C4orf34   | chromosome 4 open reading frame 34                                           | 0.65450685 |
| NM_024838    | THNSL1    | threonine synthase-like 1 (S. cerevisiae)                                    | 0.65430472 |
| NM_003155    | STC1      | stanniocalcin 1                                                              | 0.65292591 |
| NM_006918    | SC5DL     | sterol-C5-desaturase (ERG3 delta-5-desaturase homolog, S. cerevisiae)-like   | 0.65276161 |
| NM_004697    | PRPF4     | PRP4 pre-mRNA processing factor 4 homolog (yeast)                            | 0.6523723  |
| NM_181783    | TMTC3     | transmembrane and tetratricopeptide repeat containing 3                      | 0.65090729 |
| NM_002535    | OAS2      | 2'-5'-oligoadenylate synthetase 2, 69/71kDa                                  | 0.65087636 |
| NM_020401    | NUP107    | nucleoporin 107kDa                                                           | 0.65054221 |
| NM_182758    | WDR72     | WD repeat domain 72                                                          | 0.64970718 |
| NM_024604    | RPAP3     | RNA polymerase II associated protein 3                                       | 0.64950608 |
| NM_012431    | SEMA3E    | sema domain, immunoglobulin domain (Ig), short basic domain, secreted,       | 0.6494893  |
| NM_000777    | CYP3A5    | cytochrome P450, family 3, subfamily A, polypeptide 5                        | 0.64920039 |
| NM_020672    | S100A14   | S100 calcium binding protein A14                                             | 0.64690009 |
| NM_175859    | CTPS2     | CTP synthase II                                                              | 0.64574938 |
| NM_005047    | PSMD5     | proteasome (prosome, macropain) 26S subunit, non-ATPase, 5                   | 0.64504596 |
| NM_004999    | MYO6      | myosin VI                                                                    | 0.64450603 |
| NM_001873    | CPE       | carboxypeptidase E                                                           | 0.64396658 |
| NM_001114120 | DEPDC1    | DEP domain containing 1                                                      | 0.64344222 |
| NM_138374    | ZNF845    | zinc finger protein 845                                                      | 0.64252445 |
| NR_024333    | LOC147727 | hypothetical LOC147727                                                       | 0.64079215 |
| NM_020242    | KIF15     | kinesin family member 15                                                     | 0.64037362 |
| NM_152282    | ACPL2     | acid phosphatase-like 2                                                      | 0.64026782 |
| NM_003215    | TEC       | tec protein tyrosine kinase                                                  | 0.64004697 |
| NM_006089    | SCML2     | sex comb on midleg-like 2 (Drosophila)                                       | 0.63889701 |
| NM_022374    | ATL2      | atlastin GTPase 2                                                            | 0.63875316 |
| NM_006227    | PLTP      | phospholipid transfer protein                                                | 0.63868195 |

|              |          |                                                                       |            |
|--------------|----------|-----------------------------------------------------------------------|------------|
| NM_018365    | MNS1     | meiosis-specific nuclear structural 1                                 | 0.63860673 |
| NM_198433    | AURKA    | aurora kinase A                                                       | 0.63834046 |
| NM_006898    | HOXD3    | homeobox D3                                                           | 0.63788683 |
| NM_178566    | ZDHHC21  | zinc finger, DHHC-type containing 21                                  | 0.63761861 |
| NM_021244    | RRAGD    | Ras-related GTP binding D                                             | 0.63658999 |
| NM_005983    | SKP2     | S-phase kinase-associated protein 2 (p45)                             | 0.63615113 |
| NM_017631    | DDX60    | DEAD (Asp-Glu-Ala-Asp) box polypeptide 60                             | 0.63563172 |
| NM_006408    | AGR2     | anterior gradient homolog 2 ( <i>Xenopus laevis</i> )                 | 0.63562756 |
| NM_198150    | ARSK     | arylsulfatase family, member K                                        | 0.6352923  |
| NM_173842    | IL1RN    | interleukin 1 receptor antagonist                                     | 0.63514371 |
| NM_001185    | AZGP1    | alpha-2-glycoprotein 1, zinc-binding                                  | 0.63501863 |
| NM_014736    | KIAA0101 | KIAA0101                                                              | 0.63444991 |
| NM_003611    | OFD1     | oral-facial-digital syndrome 1                                        | 0.63444192 |
| NM_032730    | RTN4IP1  | reticulon 4 interacting protein 1                                     | 0.63400501 |
| NM_017741    | C4orf30  | chromosome 4 open reading frame 30                                    | 0.63390824 |
| NM_018356    | C5orf22  | chromosome 5 open reading frame 22                                    | 0.63379448 |
| NM_001145065 | KIAA1680 | KIAA1680 protein                                                      | 0.63252582 |
| NM_013277    | RACGAP1  | Rac GTPase activating protein 1                                       | 0.63249377 |
| NM_012420    | IFIT5    | interferon-induced protein with tetratricopeptide repeats 5           | 0.63242896 |
| NM_017641    | KIF21A   | kinesin family member 21A                                             | 0.63226836 |
| NM_016824    | ADD3     | adducin 3 (gamma)                                                     | 0.63148947 |
| NM_001100880 | ST20     | suppressor of tumorigenicity 20                                       | 0.63129739 |
| NM_018843    | SLC25A40 | solute carrier family 25, member 40                                   | 0.6300016  |
| NM_033495    | KLHL13   | kelch-like 13 ( <i>Drosophila</i> )                                   | 0.62892193 |
| NM_181716    | CENPV    | centromere protein V                                                  | 0.62884162 |
| NM_006933    | SLC5A3   | solute carrier family 5 (sodium/myo-inositol cotransporter), member 3 | 0.62875059 |
| NM_000888    | ITGB6    | integrin, beta 6                                                      | 0.62708327 |
| NM_145290    | GPR125   | G protein-coupled receptor 125                                        | 0.62693833 |
| NM_003981    | PRC1     | protein regulator of cytokinesis 1                                    | 0.62651049 |
| NM_005409    | CXCL11   | chemokine (C-X-C motif) ligand 11                                     | 0.62564287 |
| NM_001145775 | FKBP5    | FK506 binding protein 5                                               | 0.62411041 |
| NM_002301    | LDHC     | lactate dehydrogenase C                                               | 0.62408152 |
| NM_021190    | PTBP2    | polypyrimidine tract binding protein 2                                | 0.62350456 |
| NM_003196    | TCEA3    | transcription elongation factor A (SII), 3                            | 0.62342018 |
| NM_024670    | SUV39H2  | suppressor of variegation 3-9 homolog 2 ( <i>Drosophila</i> )         | 0.62249888 |
| NM_001296    | CCBP2    | chemokine binding protein 2                                           | 0.62134982 |
| NM_001017417 | CT45A1   | cancer/testis antigen family 45, member A1                            | 0.62098613 |
| NM_001127698 | SPINK5   | serine peptidase inhibitor, Kazal type 5                              | 0.61994667 |
| NM_033427    | CTTNBP2  | cortactin binding protein 2                                           | 0.61916141 |
| NM_001159642 | BNIP1    | BCL2/adenovirus E1B 19kD interacting protein like                     | 0.61903119 |
| NM_022090    | C5orf54  | chromosome 5 open reading frame 54                                    | 0.6190049  |
| NM_024896    | ERMP1    | endoplasmic reticulum metallopeptidase 1                              | 0.61872724 |
| NM_001001411 | ZNF676   | zinc finger protein 676                                               | 0.61872221 |
| NM_001099669 | HIGD1A   | HIG1 hypoxia inducible domain family, member 1A                       | 0.61860304 |
| NM_005687    | FARSB    | phenylalanyl-tRNA synthetase, beta subunit                            | 0.61767278 |
| NM_015938    | NMD3     | NMD3 homolog ( <i>S. cerevisiae</i> )                                 | 0.61619522 |
| NM_005333    | HCCS     | holocytochrome c synthase (cytochrome c heme-lyase)                   | 0.61580201 |

|                 |              |                                                                          |            |
|-----------------|--------------|--------------------------------------------------------------------------|------------|
| NM_032844       | MASTL        | microtubule associated serine/threonine kinase-like                      | 0.61520732 |
| NM_080652       | TMEM41A      | transmembrane protein 41A                                                | 0.61500288 |
| NM_005325       | HIST1H1A     | histone cluster 1, H1a                                                   | 0.61438115 |
| NM_001884       | HAPLN1       | hyaluronan and proteoglycan link protein 1                               | 0.61436466 |
| NM_000946       | PRIM1        | primase, DNA, polypeptide 1 (49kDa)                                      | 0.61413698 |
| NM_012259       | HEY2         | hairy/enhancer-of-split related with YRPW motif 2                        | 0.61408086 |
| NM_018448       | CAND1        | cullin-associated and neddylation-dissociated 1                          | 0.61345999 |
| NM_144973       | DENND5B      | DENN/MADD domain containing 5B                                           | 0.61332752 |
| NM_153618       | SEMA6D       | sema domain, transmembrane domain (TM), and cytoplasmic domain, (sem     | 0.61324997 |
| NM_005564       | LCN2         | lipocalin 2                                                              | 0.61265672 |
| NM_020675       | SPC25        | SPC25, NDC80 kinetochore complex component, homolog (S. cerevisiae)      | 0.61248662 |
| NM_001918       | DBT          | dihydrolipoamide branched chain transacylase E2                          | 0.6122989  |
| NM_024511       | HAUS3        | HAUS augmin-like complex, subunit 3                                      | 0.61202781 |
| NM_014735       | PHF16        | PHD finger protein 16                                                    | 0.61141042 |
| NM_017439       | PION         | pigeon homolog (Drosophila)                                              | 0.61132969 |
| NM_033360       | KRAS         | v-Ki-ras2 Kirsten rat sarcoma viral oncogene homolog                     | 0.61024858 |
| BC014881        | C9orf80      | chromosome 9 open reading frame 80                                       | 0.60938329 |
| NM_024621       | VEPH1        | ventricular zone expressed PH domain homolog 1 (zebrafish)               | 0.60898978 |
| NM_014695       | CCDC144A     | coiled-coil domain containing 144A                                       | 0.60823797 |
| NM_006601       | PTGES3       | prostaglandin E synthase 3 (cytosolic)                                   | 0.60791959 |
| NR_027471       | LOC440173    | hypothetical LOC440173                                                   | 0.60765919 |
| NM_019091       | PLEKHA3      | pleckstrin homology domain containing, family A (phosphoinositide bindin | 0.6075081  |
| NM_016073       | HDGFRP3      | hepatoma-derived growth factor, related protein 3                        | 0.60671932 |
| NM_020909       | EPB41L5      | erythrocyte membrane protein band 4.1 like 5                             | 0.60638414 |
| NM_001080449    | DNA2         | DNA replication helicase 2 homolog (yeast)                               | 0.60617602 |
| NM_032689       | ZNF607       | zinc finger protein 607                                                  | 0.60585955 |
| NM_001048       | SST          | somatostatin                                                             | 0.60426582 |
| NM_014398       | LAMP3        | lysosomal-associated membrane protein 3                                  | 0.60358673 |
| NM_001423       | EMP1         | epithelial membrane protein 1                                            | 0.6034739  |
| NM_001142292    | LMAN2L       | lectin, mannose-binding 2-like                                           | 0.60339395 |
| NM_021067       | GINS1        | GINS complex subunit 1 (Psf1 homolog)                                    | 0.60175877 |
| NM_021129       | PPA1         | pyrophosphatase (inorganic) 1                                            | 0.60164538 |
| NM_003328       | TXK          | TXK tyrosine kinase                                                      | 0.59991676 |
| NM_001037540    | SCML1        | sex comb on midleg-like 1 (Drosophila)                                   | 0.5998589  |
| NM_001099668    | HIGD1A       | HIG1 hypoxia inducible domain family, member 1A                          | 0.59982468 |
| NM_001113528    | METT5D1      | methyltransferase 5 domain containing 1                                  | 0.59954521 |
| ENST00000313266 | LOC100129455 | hypothetical LOC100129455                                                | 0.59903699 |
| NM_001013625    | C1orf192     | chromosome 1 open reading frame 192                                      | 0.59898253 |
| NM_014554       | SENP1        | SUMO1/sentrin specific peptidase 1                                       | 0.59891301 |
| NM_003137       | SRPK1        | SFRS protein kinase 1                                                    | 0.59841645 |
| NM_002499       | NEO1         | neogenin homolog 1 (chicken)                                             | 0.59758778 |
| NM_019053       | EXOC6        | exocyst complex component 6                                              | 0.59700026 |
| NM_058170       | OLFM3        | olfactomedin 3                                                           | 0.59666972 |
| NM_014050       | MRPL42       | mitochondrial ribosomal protein L42                                      | 0.5956027  |
| NM_005180       | BMI1         | BMI1 polycomb ring finger oncogene                                       | 0.59440573 |
| NM_006530       | YEATS4       | YEATS domain containing 4                                                | 0.59433492 |
| NM_018427       | RRN3         | RRN3 RNA polymerase I transcription factor homolog (S. cerevisiae)       | 0.59429819 |

|                 |              |                                                                               |            |
|-----------------|--------------|-------------------------------------------------------------------------------|------------|
| NM_015895       | GMNN         | geminin, DNA replication inhibitor                                            | 0.59387548 |
| NM_006209       | ENPP2        | ectonucleotide pyrophosphatase/phosphodiesterase 2                            | 0.59301402 |
| NM_020466       | LYRM2        | LYR motif containing 2                                                        | 0.59292036 |
| NM_004136       | IREB2        | iron-responsive element binding protein 2                                     | 0.5926095  |
| NM_004438       | EPHA4        | EPH receptor A4                                                               | 0.59260896 |
| NM_052879       | LARP4        | La ribonucleoprotein domain family, member 4                                  | 0.59259855 |
| NM_006166       | NFYB         | nuclear transcription factor Y, beta                                          | 0.59255458 |
| NM_006417       | IFI44        | interferon-induced protein 44                                                 | 0.59232875 |
| NM_018098       | ECT2         | epithelial cell transforming sequence 2 oncogene                              | 0.59216553 |
| NM_006345       | SLC30A9      | solute carrier family 30 (zinc transporter), member 9                         | 0.59172064 |
| NM_014016       | SACM1L       | SAC1 suppressor of actin mutations 1-like (yeast)                             | 0.59135432 |
| NM_133646       | ZAK          | sterile alpha motif and leucine zipper containing kinase AZK                  | 0.59088628 |
| AY956764        | HSP90AB3P    | heat shock protein 90kDa alpha (cytosolic), class B member 3 (pseudogene)     | 0.59086035 |
| NM_152376       | UBXN10       | UBX domain protein 10                                                         | 0.59029391 |
| NM_000170       | GLDC         | glycine dehydrogenase (decarboxylating)                                       | 0.58984172 |
| NM_001004470    | ST8SIA6      | ST8 alpha-N-acetyl-neuraminide alpha-2,8-sialyltransferase 6                  | 0.58969858 |
| NM_005653       | TFCP2        | transcription factor CP2                                                      | 0.58965019 |
| NM_002462       | MX1          | myxovirus (influenza virus) resistance 1, interferon-inducible protein p78 (m | 0.58673264 |
| NM_001866       | COX7B        | cytochrome c oxidase subunit VIIb                                             | 0.58634424 |
| NM_005153       | USP10        | ubiquitin specific peptidase 10                                               | 0.58561938 |
| NM_021627       | SEN2         | SUMO1/sentrin/SMT3 specific peptidase 2                                       | 0.58508281 |
| NM_014729       | TOX          | thymocyte selection-associated high mobility group box                        | 0.58491723 |
| ENST00000322630 | TIMP2        | TIMP metallopeptidase inhibitor 2                                             | -0.5844229 |
| NM_002309       | LIF          | leukemia inhibitory factor (cholinergic differentiation factor)               | -0.5844452 |
| NM_033178       | DUX4         | double homeobox, 4                                                            | -0.5845739 |
| NM_001111307    | PDE4A        | phosphodiesterase 4A, cAMP-specific (phosphodiesterase E2 dunce homolog)      | -0.5853093 |
| NM_006312       | NCOR2        | nuclear receptor co-repressor 2                                               | -0.5857246 |
| NM_003246       | THBS1        | thrombospondin 1                                                              | -0.586849  |
| NM_014280       | DNAJC8       | DnaJ (Hsp40) homolog, subfamily C, member 8                                   | -0.5872278 |
| NR_003664       | SPDYE8P      | speedy homolog E8 (Xenopus laevis), pseudogene                                | -0.5888803 |
| NR_003664       | SPDYE8P      | speedy homolog E8 (Xenopus laevis), pseudogene                                | -0.5888803 |
| NM_014705       | DOCK4        | dedicator of cytokinesis 4                                                    | -0.5890887 |
| NR_003260       | C15orf51     | chromosome 15 open reading frame 51                                           | -0.5894864 |
| NM_001105662    | USP17        | ubiquitin specific peptidase 17                                               | -0.5898291 |
| NM_175064       | SPDYE1       | speedy homolog E1 (Xenopus laevis)                                            | -0.590802  |
| NM_022748       | TNS3         | tensin 3                                                                      | -0.5910719 |
| NM_002036       | DARC         | Duffy blood group, chemokine receptor                                         | -0.591231  |
| NM_001017995    | SH3PXD2B     | SH3 and PX domains 2B                                                         | -0.5920958 |
| NM_032208       | ANTXR1       | anthrax toxin receptor 1                                                      | -0.593211  |
| NM_004978       | KCNC4        | potassium voltage-gated channel, Shaw-related subfamily, member 4             | -0.5938066 |
| NM_015892       | GALNAC4S-6ST | B cell RAG associated protein                                                 | -0.5951224 |
| NM_175064       | SPDYE1       | speedy homolog E1 (Xenopus laevis)                                            | -0.5955354 |
| NM_003255       | TIMP2        | TIMP metallopeptidase inhibitor 2                                             | -0.5959109 |
| NM_001040084    | ANXA8        | annexin A8                                                                    | -0.5970847 |
| NM_001458       | FLNC         | filamin C, gamma (actin binding protein 280)                                  | -0.597122  |
| NM_001105662    | USP17        | ubiquitin specific peptidase 17                                               | -0.5973274 |
| NM_001105662    | USP17        | ubiquitin specific peptidase 17                                               | -0.5973274 |



|                |                |                                                                             |            |
|----------------|----------------|-----------------------------------------------------------------------------|------------|
| NM_001105662   | USP17          | ubiquitin specific peptidase 17                                             | -0.5973274 |
| NM_001105662   | USP17          | ubiquitin specific peptidase 17                                             | -0.5973274 |
| NM_001105662   | USP17          | ubiquitin specific peptidase 17                                             | -0.5973274 |
| NM_001105662   | USP17          | ubiquitin specific peptidase 17                                             | -0.5973274 |
| NM_001105662   | USP17          | ubiquitin specific peptidase 17                                             | -0.5973274 |
| NR_003320 // N | SNRPN // SNOR  | small nuclear ribonucleoprotein polypeptide N // small nucleolar RNA, C/D   | -0.5977604 |
| NR_003320 // N | SNRPN // SNOR  | small nuclear ribonucleoprotein polypeptide N // small nucleolar RNA, C/D   | -0.5977604 |
| NM_153184      | CADM2          | cell adhesion molecule 2                                                    | -0.5983402 |
| NM_001127392   | C11orf9        | chromosome 11 open reading frame 9                                          | -0.5991297 |
| NM_006291      | TNFAIP2        | tumor necrosis factor, alpha-induced protein 2                              | -0.6018172 |
| NR_002326      | SNORA64        | small nucleolar RNA, H/ACA box 64                                           | -0.6024483 |
| NM_001893      | CSNK1D         | casein kinase 1, delta                                                      | -0.6029423 |
| NM_003786      | ABCC3          | ATP-binding cassette, sub-family C (CFTR/MRP), member 3                     | -0.6061022 |
| NR_003664      | SPDYE8P        | speedy homolog E8 ( <i>Xenopus laevis</i> ), pseudogene                     | -0.6094706 |
| NM_003062      | SLIT3          | slit homolog 3 ( <i>Drosophila</i> )                                        | -0.6100206 |
| NM_001129      | AEBP1          | AE binding protein 1                                                        | -0.6101724 |
| NR_003008      | SCARNA5        | small Cajal body-specific RNA 5                                             | -0.6112996 |
| NM_002742      | PRKD1          | protein kinase D1                                                           | -0.6114181 |
| NR_003664      | SPDYE8P        | speedy homolog E8 ( <i>Xenopus laevis</i> ), pseudogene                     | -0.611498  |
| NM_001797      | CDH11          | cadherin 11, type 2, OB-cadherin (osteoblast)                               | -0.6120371 |
| NM_201433      | GAS7           | growth arrest-specific 7                                                    | -0.6126388 |
| NM_052917      | GALNT13        | UDP-N-acetyl-alpha-D-galactosamine:polypeptide N-acetylgalactosaminyltr     | -0.6141818 |
| NM_005841      | SPRY1          | sprouty homolog 1, antagonist of FGF signaling ( <i>Drosophila</i> )        | -0.6149936 |
| NR_027458      | SYT14          | synaptotagmin XIV                                                           | -0.6152704 |
| NM_001080495   | TNRC18         | trinucleotide repeat containing 18                                          | -0.6156978 |
| NM_001098845   | ANXA8L1        | annexin A8-like 1                                                           | -0.6161178 |
| NM_001630      | ANXA8L2        | annexin A8-like 2                                                           | -0.6162252 |
| NM_001008271   | SCXA           | scleraxis homolog A (mouse)                                                 | -0.617417  |
| NM_001008271   | SCXA           | scleraxis homolog A (mouse)                                                 | -0.617417  |
| NM_001099435   | SPDYE5         | speedy homolog E5 ( <i>Xenopus laevis</i> )                                 | -0.6186803 |
| NM_007332      | TRPA1          | transient receptor potential cation channel, subfamily A, member 1          | -0.6191273 |
| NR_024344      | LOC283174      | hypothetical LOC283174                                                      | -0.6192804 |
| AF495523       | REXO1L1        | REX1, RNA exonuclease 1 homolog ( <i>S. cerevisiae</i> )-like 1             | -0.6194277 |
| NM_002663      | PLD2           | phospholipase D2                                                            | -0.6201861 |
| NM_178831      | GATS           | GATS, stromal antigen 3 opposite strand                                     | -0.6204409 |
| NM_004105      | EFEMP1         | EGF-containing fibulin-like extracellular matrix protein 1                  | -0.6227285 |
| NM_198098      | AQP1           | aquaporin 1 (Colton blood group)                                            | -0.6240028 |
| NM_000612      | IGF2           | insulin-like growth factor 2 (somatomedin A)                                | -0.6241641 |
| NM_014957      | DENND3         | DENN/MADD domain containing 3                                               | -0.624646  |
| NR_003666      | SPDYE7P        | speedy homolog E7 ( <i>Xenopus laevis</i> ), pseudogene                     | -0.6250371 |
| NM_080826      | ISM1           | isthmin 1 homolog (zebrafish)                                               | -0.6250879 |
| NM_005940      | MMP11          | matrix metalloproteinase 11 (stromelysin 3)                                 | -0.6252288 |
| NM_001136273   | ZFP92          | zinc finger protein 92 homolog (mouse)                                      | -0.6256978 |
| NM_178860      | SEZ6           | seizure related 6 homolog (mouse)                                           | -0.6262402 |
| NM_017551      | GRID1          | glutamate receptor, ionotropic, delta 1                                     | -0.6275046 |
| NM_138689 // N | PPP1R14B // PP | protein phosphatase 1, regulatory (inhibitor) subunit 14B // protein phosph | -0.628357  |
| NM_030569      | ITIH5          | inter-alpha (globulin) inhibitor H5                                         | -0.6323996 |

|                        |               |                                                                                   |            |
|------------------------|---------------|-----------------------------------------------------------------------------------|------------|
| NM_001014448           | CPZ           | carboxypeptidase Z                                                                | -0.6330013 |
| NM_001079807           | PGA3          | pepsinogen 3, group I (pepsinogen A)                                              | -0.6331295 |
| NM_001717              | BNC1          | basonuclin 1                                                                      | -0.6343671 |
| NR_003664              | SPDYE8P       | speedy homolog E8 ( <i>Xenopus laevis</i> ), pseudogene                           | -0.6345874 |
| NM_139072              | DNER          | delta/notch-like EGF repeat containing                                            | -0.634937  |
| NM_004205              | USP2          | ubiquitin specific peptidase 2                                                    | -0.635984  |
| NM_001854              | COL11A1       | collagen, type XI, alpha 1                                                        | -0.6372748 |
| NM_153444              | OR5P2         | olfactory receptor, family 5, subfamily P, member 2                               | -0.6373822 |
| NM_004058              | CAPS          | calcyphosine                                                                      | -0.6377526 |
| NR_003360 // NR_003360 | SNRPN // SNOR | small nuclear ribonucleoprotein polypeptide N // small nucleolar RNA, C/D         | -0.6379715 |
| NR_003303 // NR_003303 | SNRPN // SNOR | small nuclear ribonucleoprotein polypeptide N // small nucleolar RNA, C/D         | -0.6381053 |
| NR_003664              | SPDYE8P       | speedy homolog E8 ( <i>Xenopus laevis</i> ), pseudogene                           | -0.6398466 |
| NM_001079529           | FAM153B       | family with sequence similarity 153, member B                                     | -0.6409069 |
| NM_000396              | CTSK          | cathepsin K                                                                       | -0.6415802 |
| NM_006650              | CPLX2         | complexin 2                                                                       | -0.6423659 |
| NM_012242              | DKK1          | dickkopf homolog 1 ( <i>Xenopus laevis</i> )                                      | -0.6429116 |
| NM_000362              | TIMP3         | TIMP metallopeptidase inhibitor 3                                                 | -0.6432878 |
| NM_002615              | SERPINF1      | serpin peptidase inhibitor, clade F (alpha-2 antiplasmin, pigment epithelium)     | -0.6436957 |
| NR_015377              | LOC654433     | hypothetical LOC654433                                                            | -0.644179  |
| NR_003260              | C15orf51      | chromosome 15 open reading frame 51                                               | -0.6447195 |
| NR_003260              | C15orf51      | chromosome 15 open reading frame 51                                               | -0.6447195 |
| NR_003260              | C15orf51      | chromosome 15 open reading frame 51                                               | -0.6447195 |
| NM_001843              | CNTN1         | contactin 1                                                                       | -0.6447802 |
| NM_001080495           | TNRC18        | trinucleotide repeat containing 18                                                | -0.6462308 |
| NM_001831              | CLU           | clusterin                                                                         | -0.6467358 |
| NM_133373              | PLCD3         | phospholipase C, delta 3                                                          | -0.6474533 |
| NM_000855              | GUCY1A2       | guanylate cyclase 1, soluble, alpha 2                                             | -0.6480953 |
| NM_053056              | CCND1         | cyclin D1                                                                         | -0.6481172 |
| NM_153366              | SVEP1         | sushi, von Willebrand factor type A, EGF and pentraxin domain containing          | -0.6485452 |
| NR_003664              | SPDYE8P       | speedy homolog E8 ( <i>Xenopus laevis</i> ), pseudogene                           | -0.6504223 |
| NM_000358              | TGFBI         | transforming growth factor, beta-induced, 68kDa                                   | -0.6509127 |
| NM_207380              | C15orf52      | chromosome 15 open reading frame 52                                               | -0.6513055 |
| AF043897               | C9orf3        | chromosome 9 open reading frame 3                                                 | -0.6513919 |
| BC033223               | SLC45A4       | solute carrier family 45, member 4                                                | -0.6513957 |
| NM_003033              | ST3GAL1       | ST3 beta-galactoside alpha-2,3-sialyltransferase 1                                | -0.6536423 |
| NR_003594              | REXO1L2P      | REX1, RNA exonuclease 1 homolog ( <i>S. cerevisiae</i> )-like 2 (pseudogene)      | -0.6541288 |
| NM_182915              | STEAP3        | STEAP family member 3                                                             | -0.6541729 |
| NR_003664              | SPDYE8P       | speedy homolog E8 ( <i>Xenopus laevis</i> ), pseudogene                           | -0.6546172 |
| NM_032415              | CARD11        | caspase recruitment domain family, member 11                                      | -0.6546453 |
| NM_001004439           | ITGA11        | integrin, alpha 11                                                                | -0.6547366 |
| NM_018689              | KIAA1199      | KIAA1199                                                                          | -0.6552314 |
| NM_000693              | ALDH1A3       | aldehyde dehydrogenase 1 family, member A3                                        | -0.6559405 |
| NM_033178              | DUX4          | double homeobox, 4                                                                | -0.6576861 |
| NR_002312              | RPPH1         | ribonuclease P RNA component H1                                                   | -0.6581534 |
| NM_006475              | POSTN         | periostin, osteoblast specific factor                                             | -0.6585756 |
| NM_003966              | SEMA5A        | sema domain, seven thrombospondin repeats (type 1 and type 1-like), transmembrane | -0.6586299 |
| NM_014987              | IGSF9B        | immunoglobulin superfamily, member 9B                                             | -0.6586531 |

|                 |                |                                                                            |            |
|-----------------|----------------|----------------------------------------------------------------------------|------------|
| NR_003318 // NR | SNRPN // SNOR  | small nuclear ribonucleoprotein polypeptide N // small nucleolar RNA, C/D  | -0.6589514 |
| NR_003318 // NR | SNRPN // SNOR  | small nuclear ribonucleoprotein polypeptide N // small nucleolar RNA, C/D  | -0.6589514 |
| NM_002345       | LUM            | lumican                                                                    | -0.6600371 |
| NM_033178       | DUX4           | double homeobox, 4                                                         | -0.6605116 |
| NM_033178       | DUX4           | double homeobox, 4                                                         | -0.6605116 |
| NM_033178       | DUX4           | double homeobox, 4                                                         | -0.6605116 |
| NM_033178       | DUX4           | double homeobox, 4                                                         | -0.6605116 |
| NM_033178       | DUX4           | double homeobox, 4                                                         | -0.6605116 |
| NM_015039       | NMNAT2         | nicotinamide nucleotide adenylyltransferase 2                              | -0.6640617 |
| NM_002343       | LTF            | lactotransferrin                                                           | -0.6651012 |
| NR_003316 // NR | SNRPN // SNOR  | small nuclear ribonucleoprotein polypeptide N // small nucleolar RNA, C/D  | -0.6655746 |
| NM_033178       | DUX4           | double homeobox, 4                                                         | -0.665603  |
| NM_033178       | DUX4           | double homeobox, 4                                                         | -0.665603  |
| NM_001079527    | FAM153C        | family with sequence similarity 153, member C                              | -0.6677946 |
| NR_003594       | REXO1L2P       | REX1, RNA exonuclease 1 homolog (S. cerevisiae)-like 2 (pseudogene)        | -0.6687969 |
| NR_003594       | REXO1L2P       | REX1, RNA exonuclease 1 homolog (S. cerevisiae)-like 2 (pseudogene)        | -0.6687969 |
| NR_003594       | REXO1L2P       | REX1, RNA exonuclease 1 homolog (S. cerevisiae)-like 2 (pseudogene)        | -0.6687969 |
| NM_000916       | OXTR           | oxytocin receptor                                                          | -0.6693285 |
| NR_003594       | REXO1L2P       | REX1, RNA exonuclease 1 homolog (S. cerevisiae)-like 2 (pseudogene)        | -0.6713772 |
| NM_022489       | INF2           | inverted formin, FH2 and WH2 domain containing                             | -0.6718609 |
| NM_004956       | ETV1           | ets variant 1                                                              | -0.6732543 |
| NM_032532       | FNDC1          | fibronectin type III domain containing 1                                   | -0.6742197 |
| NM_002084       | GPX3           | glutathione peroxidase 3 (plasma)                                          | -0.6757626 |
| NM_001276       | CHI3L1         | chitinase 3-like 1 (cartilage glycoprotein-39)                             | -0.6764738 |
| NM_001080421    | UNC13A         | unc-13 homolog A (C. elegans)                                              | -0.6803985 |
| AK131514        | FLJ16734       | hypothetical LOC641928                                                     | -0.6814658 |
| AK131040        | LOC388022      | hypothetical gene supported by AK131040                                    | -0.681996  |
| NM_172239       | REXO1L1        | REX1, RNA exonuclease 1 homolog (S. cerevisiae)-like 1                     | -0.6821051 |
| NM_005576       | LOXL1          | lysyl oxidase-like 1                                                       | -0.6826869 |
| NM_198465       | NRK            | Nik related kinase                                                         | -0.6831147 |
| NM_001079808    | PGA4           | pepsinogen 4, group I (pepsinogen A)                                       | -0.6831424 |
| NM_002048       | GAS1           | growth arrest-specific 1                                                   | -0.6850627 |
| BC110394        | IGKC           | immunoglobulin kappa constant                                              | -0.6859098 |
| NM_002146       | HOXB3          | homeobox B3                                                                | -0.6904289 |
| NM_002010       | FGF9           | fibroblast growth factor 9 (glia-activating factor)                        | -0.6922203 |
| NM_015717       | CD207          | CD207 molecule, langerin                                                   | -0.6928237 |
| NM_144633       | KCNH8          | potassium voltage-gated channel, subfamily H (eag-related), member 8       | -0.6958689 |
| NR_002962       | SNORA23        | small nucleolar RNA, H/ACA box 23                                          | -0.6959718 |
| NM_030893       | CD1E           | CD1e molecule                                                              | -0.6989136 |
| NM_003247       | THBS2          | thrombospondin 2                                                           | -0.6994376 |
| AK125737 // AK1 | LOC440570 // L | hypothetical LOC440570 // hypothetical LOC440570                           | -0.701761  |
| AK125737 // AK1 | LOC440570 // L | hypothetical LOC440570 // hypothetical LOC440570                           | -0.701761  |
| NM_030761       | WNT4           | wingless-type MMTV integration site family, member 4                       | -0.7022689 |
| NM_001031618    | SPDYE2         | speedy homolog E2 (Xenopus laevis)                                         | -0.7035849 |
| NM_001003802    | SMARCD3        | SWI/SNF related, matrix associated, actin dependent regulator of chromatin | -0.7037606 |
| AK302597 // AK3 | POM121L8P // P | POM121 membrane glycoprotein-like 8 (rat) pseudogene // POM121 mem         | -0.7050085 |
| NM_001202       | BMP4           | bone morphogenetic protein 4                                               | -0.7121071 |

|                 |           |                                                                               |            |
|-----------------|-----------|-------------------------------------------------------------------------------|------------|
| NR_003594       | REXO1L2P  | REX1, RNA exonuclease 1 homolog ( <i>S. cerevisiae</i> )-like 2 (pseudogene)  | -0.7142775 |
| NM_133369       | UNC5A     | unc-5 homolog A ( <i>C. elegans</i> )                                         | -0.715124  |
| ENST00000390266 | LOC651751 | similar to Ig kappa chain V-II region RPMI 6410 precursor                     | -0.7159498 |
| NM_001018111    | PODXL     | podocalyxin-like                                                              | -0.7165068 |
| NM_001146210    | SPDYE6    | speedy homolog E6 ( <i>Xenopus laevis</i> )                                   | -0.7169979 |
| NM_014224       | PGA5      | pepsinogen 5, group I (pepsinogen A)                                          | -0.7170548 |
| NM_001031618    | SPDYE2    | speedy homolog E2 ( <i>Xenopus laevis</i> )                                   | -0.7185056 |
| NM_006952       | UPK1B     | uroplakin 1B                                                                  | -0.7201784 |
| NM_002705       | PPL       | periplakin                                                                    | -0.7208058 |
| NM_001765       | CD1C      | CD1c molecule                                                                 | -0.7245743 |
| NM_138420       | AHNAK2    | AHNAK nucleoprotein 2                                                         | -0.7274591 |
| NM_002501       | NFIX      | nuclear factor I/X (CCAAT-binding transcription factor)                       | -0.7309073 |
| NM_004530       | MMP2      | matrix metalloproteinase 2 (gelatinase A, 72kDa gelatinase, 72kDa type IV c   | -0.7331163 |
| NM_001711       | BGN       | biglycan                                                                      | -0.7336677 |
| NM_005556       | KRT7      | keratin 7                                                                     | -0.7364452 |
| NM_022127       | SLC28A3   | solute carrier family 28 (sodium-coupled nucleoside transporter), member      | -0.7413985 |
| NM_024794       | EPHX3     | epoxide hydrolase 3                                                           | -0.7414571 |
| AF043897        | C9orf3    | chromosome 9 open reading frame 3                                             | -0.7420272 |
| NM_033178       | DUX4      | double homeobox, 4                                                            | -0.7451033 |
| NM_001017915    | INPP5D    | inositol polyphosphate-5-phosphatase, 145kDa                                  | -0.7469917 |
| NM_005545       | ISLR      | immunoglobulin superfamily containing leucine-rich repeat                     | -0.7512967 |
| ---             | ---       | ---                                                                           | -0.7522138 |
| NM_001763       | CD1A      | CD1a molecule                                                                 | -0.7542769 |
| ---             | ---       | ---                                                                           | -0.7566687 |
| NM_004445       | EPHB6     | EPH receptor B6                                                               | -0.756673  |
| NM_022731       | NUCKS1    | nuclear casein kinase and cyclin-dependent kinase substrate 1                 | -0.7577432 |
| NM_022475       | HHIP      | hedgehog interacting protein                                                  | -0.7590401 |
| NM_139055       | ADAMTS15  | ADAM metalloproteinase with thrombospondin type 1 motif, 15                   | -0.7616786 |
| NM_024721       | ZFHX4     | zinc finger homeobox 4                                                        | -0.7620738 |
| NM_001080495    | TNRC18    | trinucleotide repeat containing 18                                            | -0.7624972 |
| NM_005937       | MLLT6     | myeloid/lymphoid or mixed-lineage leukemia (trithorax homolog, <i>Drosoph</i> | -0.7637821 |
| NM_016240       | SCARA3    | scavenger receptor class A, member 3                                          | -0.7714789 |
| NM_003749       | IRS2      | insulin receptor substrate 2                                                  | -0.7720224 |
| NM_001447       | FAT2      | FAT tumor suppressor homolog 2 ( <i>Drosophila</i> )                          | -0.775485  |
| NM_000428       | LTBP2     | latent transforming growth factor beta binding protein 2                      | -0.7755655 |
| BC132953        | C8orf15   | chromosome 8 open reading frame 15                                            | -0.7783029 |
| NR_003594       | REXO1L2P  | REX1, RNA exonuclease 1 homolog ( <i>S. cerevisiae</i> )-like 2 (pseudogene)  | -0.7814956 |
| NM_024690       | MUC16     | mucin 16, cell surface associated                                             | -0.7857184 |
| NM_000956       | PTGER2    | prostaglandin E receptor 2 (subtype EP2), 53kDa                               | -0.7906596 |
| NM_001079529    | FAM153B   | family with sequence similarity 153, member B                                 | -0.7913675 |
| NM_033178       | DUX4      | double homeobox, 4                                                            | -0.7987266 |
| ---             | ---       | ---                                                                           | -0.7991984 |
| NR_027279       | DUB4      | deubiquitinating enzyme DUB4                                                  | -0.7995314 |
| ---             | ---       | ---                                                                           | -0.8049433 |
| BC093097        | IGKC      | immunoglobulin kappa constant                                                 | -0.807217  |
| NM_003654       | CHST1     | carbohydrate (keratan sulfate Gal-6) sulfotransferase 1                       | -0.8079668 |
| ---             | ---       | ---                                                                           | -0.8096149 |

|                |               |                                                                             |            |
|----------------|---------------|-----------------------------------------------------------------------------|------------|
| NM_000820      | GAS6          | growth arrest-specific 6                                                    | -0.8115258 |
| NM_001128205   | SULF1         | sulfatase 1                                                                 | -0.8121844 |
| NM_002658      | PLAU          | plasminogen activator, urokinase                                            | -0.8128709 |
| NM_001898      | CST1          | cystatin SN                                                                 | -0.8176982 |
| NM_004994      | MMP9          | matrix metalloproteinase 9 (gelatinase B, 92kDa gelatinase, 92kDa type IV c | -0.8193481 |
| NM_014485      | PGDS          | prostaglandin D2 synthase, hematopoietic                                    | -0.8229312 |
| NM_020223      | FAM20C        | family with sequence similarity 20, member C                                | -0.8241042 |
| NR_003323 // N | SNRPN // SNOR | small nuclear ribonucleoprotein polypeptide N // small nucleolar RNA, C/D   | -0.8284582 |
| NM_020733      | HEG1          | HEG homolog 1 (zebrafish)                                                   | -0.8406983 |
| NM_003014      | SFRP4         | secreted frizzled-related protein 4                                         | -0.8504057 |
| AF043897       | C9orf3        | chromosome 9 open reading frame 3                                           | -0.8507948 |
| NM_001005463   | EBF3          | early B-cell factor 3                                                       | -0.8527335 |
| ---            | ---           | ---                                                                         | -0.8557671 |
| NR_002449      | SNORA65       | small nucleolar RNA, H/ACA box 65                                           | -0.8580299 |
| NM_001039350   | DPP6          | dipeptidyl-peptidase 6                                                      | -0.860412  |
| NR_003321 // N | SNRPN // SNOR | small nuclear ribonucleoprotein polypeptide N // small nucleolar RNA, C/D   | -0.8645501 |
| NM_001850      | COL8A1        | collagen, type VIII, alpha 1                                                | -0.8850874 |
| ---            | ---           | ---                                                                         | -0.8871185 |
| NM_001145204   | LOC729993     | hypothetical protein LOC729993                                              | -0.8942506 |
| NM_019601      | SUSD2         | sushi domain containing 2                                                   | -0.8949013 |
| NM_033223      | GABRG3        | gamma-aminobutyric acid (GABA) A receptor, gamma 3                          | -0.8960841 |
| ---            | ---           | ---                                                                         | -0.9109589 |
| ---            | ---           | ---                                                                         | -0.9241143 |
| NM_021101      | CLDN1         | claudin 1                                                                   | -0.9252019 |
| NM_001080512   | BICC1         | bicaudal C homolog 1 (Drosophila)                                           | -0.9253032 |
| NM_058229      | FBXO32        | F-box protein 32                                                            | -0.9374885 |
| ---            | ---           | ---                                                                         | -0.9376755 |
| ---            | ---           | ---                                                                         | -0.9383524 |
| NM_000095      | COMP          | cartilage oligomeric matrix protein                                         | -0.9489644 |
| AK092862       | FLJ41484      | hypothetical LOC650669                                                      | -0.9496569 |
| BC018448       | MALAT1        | metastasis associated lung adenocarcinoma transcript 1 (non-protein coding  | -0.9528193 |
| NM_002204      | ITGA3         | integrin, alpha 3 (antigen CD49C, alpha 3 subunit of VLA-3 receptor)        | -0.9565525 |
| NM_002281      | KRT81         | keratin 81                                                                  | -0.9572443 |
| NM_001127500   | MET           | met proto-oncogene (hepatocyte growth factor receptor)                      | -0.967565  |
| NM_001085423   | C17orf60      | chromosome 17 open reading frame 60                                         | -0.9789255 |
| NM_000213      | ITGB4         | integrin, beta 4                                                            | -0.9816535 |
| NM_001337      | CX3CR1        | chemokine (C-X3-C motif) receptor 1                                         | -1.0112926 |
| NM_152611      | LRRN4         | leucine rich repeat neuronal 4                                              | -1.0164014 |
| NM_181690      | AKT3          | v-akt murine thymoma viral oncogene homolog 3 (protein kinase B, gamma      | -1.0343102 |
| NM_001017403   | LGR6          | leucine-rich repeat-containing G protein-coupled receptor 6                 | -1.0483819 |
| NM_017852      | NLRP2         | NLR family, pyrin domain containing 2                                       | -1.0551682 |
| NM_000362      | TIMP3         | TIMP metalloproteinase inhibitor 3                                          | -1.0663665 |
| NM_003613      | CILP          | cartilage intermediate layer protein, nucleotide pyrophosphohydrolase       | -1.0915372 |
| NM_000064      | C3            | complement component 3                                                      | -1.1084812 |
| NM_003013      | SFRP2         | secreted frizzled-related protein 2                                         | -1.1153132 |
| NM_004625      | WNT7A         | wingless-type MMTV integration site family, member 7A                       | -1.1162621 |
| NM_000425      | L1CAM         | L1 cell adhesion molecule                                                   | -1.1770945 |

|              |          |                                     |            |
|--------------|----------|-------------------------------------|------------|
| NM_021189    | CADM3    | cell adhesion molecule 3            | -1.1790226 |
| NM_004950    | EPYC     | epiphycan                           | -1.2010173 |
| NM_001007544 | C1orf186 | chromosome 1 open reading frame 186 | -1.3043064 |
| NM_003914    | CCNA1    | cyclin A1                           | -1.3227037 |
| NM_001079858 | GPR64    | G protein-coupled receptor 64       | -1.3843022 |
| NM_005143    | HP       | haptoglobin                         | -1.8204692 |
| NM_003890    | FCGBP    | Fc fragment of IgG binding protein  | -1.8866216 |
| NM_006580    | CLDN16   | claudin 16                          | -2.3167339 |
